# Supplementary material for: Differential Effects of Ticagrelor With or Without Aspirin on Platelet Reactivity and Coagulation Activation: A Randomized Trial in Healthy Volunteers
Source: PubMed Central journal article supplement — Clin Pharmacol Ther. 2019 Sep 28;107(2):415–22. doi: 10.1002/cpt.1616 (PMC7006887; doi:10.1002/cpt.1616), 2019-09-28
Supplement: CPT-107-415-s001.pdf [file CPT-107-415-s001.pdf]

**Table S1.** Effects of ticagrelor combined with aspirin and ticagrelor combined with placebo on platelet reactivity evaluated with MEA-ADP, MEA-AA, and VASP in venous blood from baseline to 24 h and from 2 h to 24 h in 44 healthy male volunteers

|                            | MEA-ADP (U)             |                         | MEA-AA (U)              |                       | VASP (PRI)              |                         |
|----------------------------|-------------------------|-------------------------|-------------------------|-----------------------|-------------------------|-------------------------|
|                            | Ticagrelor + aspirin    | Ticagrelor + placebo    | Ticagrelor + aspirin    | Ticagrelor + placebo  | Ticagrelor + aspirin    | Ticagrelor + placebo    |
| Baseline                   | 70<br>(63; 79)          | 67<br>(62; 74)          | 84.5<br>(78; 91)        | 83.5<br>(79; 94)      | 85<br>(82; 87.6)        | 85.6<br>(81.8; 87.1)    |
| 2 h                        | 20<br>(16; 24)          | 24<br>(20; 27)          | 11<br>(7; 16)           | 60<br>(48; 72)        | 10.1<br>(4.9; 16)       | 12.1<br>(6.8; 18.2)     |
| 24 h                       | 32.5<br>(26; 45)        | 31<br>(27; 55)          | 18.5<br>(13; 24)        | 74.5<br>(72; 86)      | 43.9<br>(31.4; 54.1)    | 46<br>(33.8; 63.5)      |
| p-Value <sup>a</sup>       | <0.0001                 | <0.0001                 | <0.0001                 | 0.02                  | <0.0001                 | <0.0001                 |
| p-Value <sup>b</sup>       | 0.049                   |                         | <0.0001                 |                       | 0.27                    |                         |
| $\Delta$ mean <sup>a</sup> | -36.6<br>(-40.9; -32.4) | -30.6<br>(-34.9; -26.4) | -67.0<br>(-73.8; -60.3) | -9.4<br>(-16.1; -2.6) | -40.3<br>(-49.5; -31.2) | -33.2<br>(-42.4; -24.0) |
| $\Delta$ mean <sup>b</sup> | -6.0                    |                         | -57.7                   |                       | -7.1                    |                         |

|                      |                     |                     |                        |                      |                      |                      |
|----------------------|---------------------|---------------------|------------------------|----------------------|----------------------|----------------------|
|                      | (-12.0; -0.02)      |                     | (-67.3; -48.1)         |                      | (-20.1; 5.9)         |                      |
| p-Value <sup>c</sup> | <0.0001             | <0.0001             | 0.01                   | <0.0001              | <0.0001              | <0.0001              |
| p-Value <sup>d</sup> | 0.85                |                     | 0.002                  |                      | 0.33                 |                      |
| Δmean <sup>c</sup>   | 14.7<br>(8.7; 20.7) | 15.5<br>(9.5; 21.6) | 5.9<br>(1.4; 10.3)     | 16.3<br>(11.9; 20.8) | 30.0<br>(20.8; 39.2) | 36.4<br>(27.2; 45.6) |
| Δmean <sup>d</sup>   | -0.8<br>(-9.3; 7.7) |                     | -10.5<br>(-16.8; -4.1) |                      | -6.4<br>(-19.4; 6.6) |                      |

<sup>a</sup>From baseline to 24 h. <sup>b</sup>Differences between treatment groups in the interval from baseline to 24 h. <sup>c</sup>From 2 h to 24 h. <sup>d</sup>Differences between treatment groups in the interval from 2 h to 24 h. Values are given as median (quartiles) or mean difference (Δmean) (95% confidence interval) for multiple electrode aggregometry ADPtest (MEA-ADP), multiple electrode aggregometry ASPItest (MEA-AA), and vasodilator-stimulated phosphoprotein (VASP). U = units, PRI = platelet reactivity index.
