# Supplementary material for: Differential Effects of Ticagrelor With or Without Aspirin on Platelet Reactivity and Coagulation Activation: A Randomized Trial in Healthy Volunteers
Source: PubMed Central journal article supplement — Clin Pharmacol Ther. 2019 Sep 28;107(2):415–22. doi: 10.1002/cpt.1616 (PMC7006887; doi:10.1002/cpt.1616), 2019-09-28
Supplement: CPT-107-415-s002.pdf [file CPT-107-415-s002.pdf]

**Table S2.** Effects of ticagrelor combined with aspirin and ticagrelor combined with placebo on coagulation activation evaluated with f1.2 and d-Dimer in venous blood from baseline to 24 h and from 2 h to 24 h in 44 healthy male volunteers

|                      | <b>f1.2 (nmol L<sup>-1</sup>)</b> |                                 | <b>d-Dimer (mcg mL<sup>-1</sup>)</b> |                                 |
|----------------------|-----------------------------------|---------------------------------|--------------------------------------|---------------------------------|
|                      | <b>Ticagrelor +<br/>aspirin</b>   | <b>Ticagrelor +<br/>placebo</b> | <b>Ticagrelor +<br/>aspirin</b>      | <b>Ticagrelor +<br/>placebo</b> |
| Baseline             | 0.094<br>(0.084; 0.126)           | 0.095<br>(0.079; 0.159)         | 0.104<br>(0.085; 0.166)              | 0.142<br>(0.089; 0.230)         |
| 2 h                  | 0.080<br>(0.076; 0.116)           | 0.091<br>(0.070; 0.141)         | 0.098<br>(0.080; 0.142)              | 0.138<br>(0.089; 0.213)         |
| 24 h                 | 0.091<br>(0.078; 0.114)           | 0.091<br>(0.071; 0.149)         | 0.109<br>(0.082; 0.150)              | 0.130<br>(0.085; 0.190)         |
| p-Value <sup>a</sup> | 0.30                              | 0.36                            | 0.13                                 | <0.0001                         |
| p-Value <sup>b</sup> | 0.17                              |                                 | 0.046                                |                                 |
| GMR <sup>a</sup>     | 1.11<br>(0.91; 1.36)              | 0.91<br>(0.74; 1.12)            | 0.95<br>(0.90; 1.01)                 | 0.88<br>(0.82; 0.93)            |
| GMR <sup>b</sup>     | 1.22                              |                                 | 1.09                                 |                                 |

|                      |                      |                      |                      |                      |
|----------------------|----------------------|----------------------|----------------------|----------------------|
|                      | (0.92; 1.63)         |                      | (1.00; 1.19)         |                      |
| p-Value <sup>c</sup> | 0.07                 | 0.70                 | 0.04                 | 0.27                 |
| p-Value <sup>d</sup> | 0.31                 |                      | 0.02                 |                      |
| GMR <sup>c</sup>     | 1.21<br>(0.98; 1.48) | 1.04<br>(0.85; 1.28) | 1.08<br>(1.01; 1.15) | 0.96<br>(0.90; 1.03) |
| GMR <sup>d</sup>     | 1.16<br>(0.87; 1.55) |                      | 1.12<br>(1.02; 1.23) |                      |

<sup>a</sup>From baseline to 24 h. <sup>b</sup>Differences between treatment groups in the interval from baseline to 24 h. <sup>c</sup>From 2 h to 24 h. <sup>d</sup>Differences between treatment groups in the interval from 2 h to 24 h. Values are given as median (quartiles) and geometric mean ratio (GMR) (95% confidence interval) for prothrombin fragment 1.2 (f1.2) and d-Dimer, respectively.
