# Supplementary material for: Differential Effects of Ticagrelor With or Without Aspirin on Platelet Reactivity and Coagulation Activation: A Randomized Trial in Healthy Volunteers
Source: PubMed Central journal article supplement — Clin Pharmacol Ther. 2019 Sep 28;107(2):415–22. doi: 10.1002/cpt.1616 (PMC7006887; doi:10.1002/cpt.1616), 2019-09-28
Supplement: CPT-107-415-s003.pdf [file CPT-107-415-s003.pdf]

**Table S3.** Effects of ticagrelor combined with aspirin and ticagrelor combined with placebo on platelet activity evaluated with TxB<sub>2</sub> in 44 healthy male volunteers

|                      | TxB <sub>2</sub> (ng mL <sup>-1</sup> ) |                      |
|----------------------|-----------------------------------------|----------------------|
|                      | Ticagrelor + aspirin                    | Ticagrelor + placebo |
| Baseline             | 20.7 (10.4; 38.1)                       | 16.4 (10.1; 37.5)    |
| 24 h                 | 0.3 (0.1; 0.4)                          | 15.5 (10.6, 22.7)    |
| p-Value <sup>a</sup> | <0.0001                                 | 0.85                 |
| p-Value <sup>b</sup> | <0.0001                                 |                      |

<sup>a</sup>From baseline to 24 h. <sup>b</sup>Difference between treatment groups in changes to 24 h. Values are given as median (quartiles) for thromboxane B<sub>2</sub> (TxB<sub>2</sub>).
